# Supplementary material
Source: PubMed Central journal article supplement (PMC9713674)
Supplement: jamacardiol-e224373-s001.pdf [file jamacardiol-e224373-s001.pdf]

Original Protocol

**Leveraging the Electronic Health Record to Nudge  
Clinicians to Prescribe Evidence-Based Statin Medications  
to Reduce the Risk of Cardiovascular Disease: A  
Randomized Clinical Trial**

September 2020

10

## **Outline**

11 1. Abstract

12 2. Overall objectives

13 3. Aims

14 3.1 Primary outcome

15 4. Background

16 5. Study design

17 5.1 Design

18 5.2 Study duration

19 5.3 Target population

20 5.4 Accrual

21 5.5 Key inclusion criteria

22 5.6 Key exclusion criteria

23 6. Subject recruitment

24 7. Subject compensation

25 8. Study procedures

26 8.1 Consent

27 8.2 Procedures

28 9. Analysis plan

29 10. Investigators

30 11. Human research protection

31 11.1 Data confidentiality

32 11.2 Subject confidentiality

33 11.3 Subject privacy

34 11.4 Data disclosure

|    |                                 |
|----|---------------------------------|
| 35 | 11.5 Data safety and monitoring |
| 36 | 11.6 Risk/benefit               |
| 37 | 11.6.1 Potential study risks    |
| 38 | 11.6.2 Potential study benefits |
| 39 | 11.6.3 Risk/benefit assessment  |
| 40 |                                 |

41 **1. Abstract**

42 Cardiovascular disease (CVD) is the leading cause of mortality in the United States. Statins have  
43 been demonstrated to be an effective tool for reducing the risk of CVD-related events and  
44 mortality, but statins are often not prescribed for patients that meet evidence-based guidelines.  
45 In this study, we will evaluate nudges to clinicians, patients, or both to initiate statin  
46 prescriptions for patients that meet the United States Preventive Task Force guidelines, patients  
47 with clinical ASCVD condition, and patients with a history of familial hyperlipidemia. In  
48 partnership with the health system, this will be conducted as a 4-arm factorial, cluster  
49 randomized trial to evaluate the effect of the interventions.

50 **2. Overall objectives**

51 The objective of the study is to evaluate the effect of nudges to clinicians, patients, or both to  
52 initiate statin prescriptions for patients that meet national guidelines.

53 **3. Aims**

54 *3.1 Primary outcome*

55 The primary outcome measure is percent of patients prescribed a statin medication.

56

57 **4. Background**

58 Statins have been found to reduce atherosclerotic cardiovascular disease (ASCVD) events and  
59 mortality by up to 30% [1]. Statins are affordable and generally well-tolerated [2]. However, less  
60 than 50% of eligible patients are prescribed a statin [3]. Previous work has demonstrated how  
61 insights from behavioral economics can be used to design nudges to improve statin prescribing  
62 by primary care physicians [4].

63 *References*

64 [1] Mozaffarian, D., Benjamin, E. J., Go, A. S., Arnett, D. K., Blaha, M. J., Cushman, M., ... &  
65 Huffman, M. D. (2015). Forecasting the future of cardiovascular disease in the United States: a  
66 policy statement from the American Heart Association. *Circulation*, *131*(4), e29-e322.

67 [2] Stone, N. J., Robinson, J. G., Lichtenstein, A. H., Merz, C. N. B., Blum, C. B., Eckel, R. H.,  
68 ... & McBride, P. (2014). ACC/AHA prevention guideline. *Circulation*, *129*(2), S1-S45.

69 [3] Salami, J. A., Warraich, H., Valero-Elizondo, J., Spatz, E. S., Desai, N. R., Rana, J. S., ... &  
70 Blumenthal, R. S. (2017). National trends in statin use and expenditures in the US adult  
71 population from 2002 to 2013: insights from the Medical Expenditure Panel Survey. *Jama*  
72 *cardiology*, *2*(1), 56-65.

73 [4] Patel, M. S., Kurtzman, G. W., Kannan, S., Small, D. S., Morris, A., Honeywell, S., ... &  
74 Volpp, K. G. (2018). Effect of an Automated Patient Dashboard Using Active Choice and Peer  
75 Comparison Performance Feedback to Physicians on Statin Prescribing: The PRESCRIBE  
76 Cluster Randomized Clinical Trial. *JAMA Network Open*, 1(3), e180818-e180818.

77

## 78 **5. Study design**

### 79 *5.1 Design*

80 This study will be a pragmatic trial to evaluate nudges to clinicians, patients, or both within  
81 primary care practices at Penn Medicine over a 6-month intervention period. This will include  
82 three interventions tested through a 4-arm, factorial, cluster randomized trial. Patient eligibility  
83 for statins will be based on the United States Preventive Services Task Force guidelines,  
84 presence of an ASCVD condition, or history of familial hyperlipidemia.

85 The four-arm factorial trial will randomly assign primary care practices to the following arms: 1)  
86 Control with no interventions; 2) Clinician nudge using an active choice prompt in the electronic  
87 health record at the time of the patient visit and a monthly peer comparison message on statin  
88 prescribing performance relative to peer clinicians at Penn Medicine delivered through the  
89 electronic health record; 3) Patient nudge using a text message sent to patients via a Penn  
90 Medicine approved platform before an appointment with their primary care clinician that informs  
91 them of their eligibility for a statin, the risks and benefits, and asking them to discuss the role of  
92 starting a statin with their PCP; 4) Both clinician nudge using peer comparisons and patient  
93 nudge using statin message. This trial will have a 12-month pre-intervention period and a 6-  
94 month intervention period. Given the uncertainty of patient volume with the COVID-19  
95 pandemic, the trial may be extended until the minimum sample size is met for the specified  
96 power calculations.

### 97 *5.2 Study duration*

98 The study is expected to take 2 years to complete including study preparation, trial intervention,  
99 analysis, and dissemination.

### 100 *5.3 Target population*

101 Patients in primary care practices at Penn Medicine who have a new or return visit with their  
102 primary care clinician either in-person or via telemedicine during the intervention period and are  
103 eligible for a statin medication based on the United States Preventive Services Task Force  
104 guidelines, presence of an ASCVD condition, or history of familial hyperlipidemia.

### 105 *5.4 Accrual*

106 Patients in this pragmatic trial will accrue based on their eligible visit during the study period.

107 *5.5 Key inclusion criteria*

108 Patients must meet the following criteria to be eligible for the study:

- 109 1) Have a primary care provider at one of the study practices at the University of  
110 Pennsylvania Health System;
- 111 2) Either have an ASCVD condition, history of familial hyperlipidemia, or meet United  
112 State Preventive Task Force Guidelines for Statin Therapy which includes age 40-75  
113 years, at least 1 cardiovascular risk factor (e.g. dyslipidemia, diabetes, hypertension,  
114 smoking), 10-year ASVCD risk score  $\geq 10\%$

115 *5.6 Key exclusion criteria*

116 Patients will be excluded if any of the following criteria is met: 1) Already prescribed a statin; 2)  
117 Allergy to statins; 3) Severe renal insufficiency defined as glomerular filtration rate (GFR) less  
118 than 30 mL/min or on dialysis; 4) Adverse reaction to statins including statin-related a)  
119 myopathy; b) Rhabdomyolysis; c) hepatitis; 5) Pregnant; 6) Currently breastfeeding; 7) on  
120 hospice or at the end-of-life; 8) On a PCSK9 Inhibitor medication

121 Clinicians (and their respective patients) will be excluded if they have less than 10 patients  
122 among their entire panel that are eligible for a statin medication.

123 **6. Subject recruitment**

124 Information on primary care providers and their patients at the University of Pennsylvania  
125 Health system will be obtained from the electronic health record using Penn Data Store and  
126 Clarity, an Epic reporting database.

127 **7. Subject compensation**

128 No compensation will be offered in this study.

129 **8. Study procedures**

130 *8.1 Consent*

131 A waiver of informed consent is requested for the following reasons. First, it is not feasible to  
132 consent every patient and clinician and as mentioned this initiative would occur with or without  
133 the study of it. Second, if members of the control group were consented, they would know they  
134 were being studied and this could change their behavior. This could potential disrupt the design  
135 of the study and make interpretation of the findings challenging. Third, clinicians are not being  
136 forced to prescribe statins for their patients. Instead, they are being reminded of evidence-based  
137 guidelines and offered an opportunity to review pertinent information and prescribe a statin.  
138 This is no different than standard of care in which a clinician would review the same information

139 and decide to prescribe a statin or not. The initiative is simply a reminder for the clinician and  
140 makes their standard of care process easier to conduct.

## 141 *8.2 Procedures*

### 142 --Interventions--

143 The clinician nudge using monthly peer comparison messages will be sent as an inbox message  
144 through the electronic health record. Clinicians will be told what percent of their eligible patients  
145 have been prescribed a statin and how that compares to peer clinicians at Penn Medicine. If the  
146 prescribing rate is below the median, the clinician will be compared to the median. If it is above  
147 the median, the clinician will be compared to ‘top performers’ defined as the 90<sup>th</sup> percentile. If  
148 the clinician is a top performer, they will be informed of that.

149 The clinician nudge using an active choice intervention in the electronic health record will be  
150 delivered to the clinician when he or she opens the patient’s chart during the patient’s visit and is  
151 on the test ordering page. This will be through a Best Practice Advisory that describes the  
152 guideline criteria for which the patient is eligible for statin therapy, provides preselected options  
153 for a statin (based on if the patient meets criteria for a moderate or high dose) with alternative  
154 options.

155 The patient nudge will be a message sent by text message. Patients with a new or return visit  
156 with their primary care clinician either in-person or via telemedicine will be identified and sent  
157 this message 72 hours prior to their appointment. The message will remind them of the visit,  
158 inform them of their eligibility for a statin, describe the benefits and risks of statin therapy,  
159 provide a link to a shared decision-making tool for statin therapy, and ask the patient to discuss  
160 statin therapy with their primary care clinician during the visit.

### 161 --Data--

162 Data on primary care clinicians and their patients at Penn Medicine will be obtained from Penn  
163 Data Store and Clarity (Epic’s data reporting database). Clinician data includes demographic  
164 information (age, race, gender, type of medical degree, etc.) and may be also obtained from  
165 publicly available databases or websites online. Patient information includes demographic  
166 information, information about comorbid conditions (including diabetes, hypertension, and  
167 chronic kidney disease, and comorbid conditions needed to calculate the Charleston Comorbidity  
168 Index), laboratory test results (total cholesterol, triglycerides, LDL-C, HDL-C, liver function  
169 tests, creatinine, and glomerular filtration rate), and any contraindications to statin prescription  
170 (allergies or history of adverse reactions).

### 171 --Randomization—

172 Primary care practice level randomization will occur electronically. For the 4-arm parallel trial (4  
173 groups), practices will be randomized using block sizes of 4 and stratifying on 7 groups of 4

174 practices based on mean statin prescribing rate. This method will ensure that the 4 arms each of 7  
175 practices and are well balanced.

## 176 **9. Analysis plan**

177 Prior to analyses, we will produce data summaries to assess data quality, data distribution, and  
178 randomization success. All analyses will be performed using an intention-to-treat approach. To  
179 ensure even comparison across practices and arms, we will classify eligible patients at 72 hours  
180 before a scheduled appointment for a new or return visit with their primary care clinician as  
181 being in the study sample. Patients who do not show up to the clinician visit will be consider to  
182 have not received a statin unless one was prescribed within the 72 hour window prior to the visit.

183 Using retrospective data from our health system and conducting simulations, we estimate that we  
184 have at least 90% power to detect a 5-percentage difference in the statin prescribing rate for the  
185 clinician and patient main effects and at least 80% power to detect an 8-percentage point change  
186 in the clinician-patient interaction effects. This estimate uses retrospective data on 189 clinicians  
187 at Penn Medicine as its baseline and assumes 3000 patient visits over a 6-month period.

188 The primary analysis will fit mixed effects models with the patient as the unit of analysis to  
189 evaluate the odds of statin prescription (or change in other variables), adjusting for time, baseline  
190 statin prescription rates in the pre-intervention period, and clustering at the level of the practice  
191 and clinician. To obtain the adjusted difference in the percentage of patients prescribed a statin  
192 and 95% confidence intervals, we will use the bootstrap method, resampling patients 1000 times.  
193 Resampling of patients will be conducted by clinician to maintain clustering at the clinician and  
194 practice site level.

195 We will control for multiple testing using a structured testing approach that is designed for a 2x2  
196 factorial trial in which we will prioritize testing for main effects, followed by interaction effects.  
197 We will first test the null hypothesis of either a main effect of clinician nudge or patient nudge at  
198 an alpha level of 0.05; if this test is rejected, we will test (i) the null hypothesis of no main effect  
199 of clinician nudge; (ii) the null hypothesis of no main effect of patient nudge at an alpha level of  
200 0.05; if both of these tests are rejected, we will test for an interaction at an alpha level of 0.05.  
201 This sequential structured testing procedure controls the familywise Type I error rate at a level of  
202 0.05 and has greater power for testing main effects than a Bonferroni approach.

203 We will perform subgroup analyses using available participant sociodemographic characteristics  
204 including age, sex, and race/ethnicity to evaluate for differences in change in statin prescription  
205 rates. If differences in outcomes exist, we will fit a fully adjusted model that includes these  
206 covariates and interaction terms with the treatment arms to evaluate for statistical significance.

## 207 **10. Investigators**



208 Mitesh Patel, MD, MBA, MS is the Principal Investigator (PI) and is a the Ralph Muller  
209 Presidential Ralph Muller Presidential Associate Professor of Medicine and Health Care  
210 Management at the Perelman School of Medicine and The Wharton School at the University of  
211 Pennsylvania. He has past experience leading clinical trials to deploy interventions impacting  
212 patient care and outcomes. He currently spends 80% of his effort on research and 20% on  
213 clinical and teaching activities.

214 David Asch, MD, MBA is a co-investigator and is a Professor of Medicine and a Professor of  
215 Health Care Management at the Perelman School of Medicine and The Wharton School at the  
216 University of Pennsylvania and the Executive Director at the Center for Health Care Innovation  
217 at the University of Pennsylvania. He has extensive past experience conducting research,  
218 designing and leading clinical trials, and implementing new policies to improve patient care.

219 Srinath Adusumalli, MD, MSc, FACC is a co-investigator and an Assistant Professor of Clinical  
220 Medicine at the Perelman School of Medicine, a general cardiologist, echocardiographer, and  
221 assistant cardiovascular disease fellowship program director at the Hospital of the University of  
222 Pennsylvania. He has previous experience conducting research studies and deploying active  
223 choice interventions directed at statin prescription within the electronic health record.

224

225

## 226 **11. Human research protection**

### 227 *11.1 Data confidentiality*

228 Computer-based files will only be made available to personnel involved in the study through the  
229 use of access privileges and passwords. Wherever feasible, identifiers will be removed from  
230 study-related information. Precautions are already in place to ensure the data are secure by using  
231 passwords and HIPAA-compliant encryption.

### 232 *11.2 Subject confidentiality*

233 Data on clinicians and patients will be obtained from Epic and Penn Data Store. Any information  
234 that is obtained will be used for research purposes only. Information on patients will only be  
235 disclosed within the study team and to the patient's primary care clinician. All study staff will be  
236 reminded of the confidential nature of the data collected and contained in these databases.

237 Penn Medicine Academic Computing Services (PMACS) will be the hub for the  
238 hardware and database infrastructure that will support the project and where the project web  
239 portal is based. PMACS is a joint effort of the University of Pennsylvania's Abramson Cancer  
240 Center, the Cardiovascular Institute, the Department of Pathology, and the Leonard Davis  
241 Institute. PMACS provides a secure computing environment for a large volume of highly  
242 sensitive data, including clinical, genetic, socioeconomic, and financial information. Among the

243 IT projects currently managed by PMACS are: (1) the capture and organization of complex,  
244 longitudinal clinical data via web and clinical applications portals from cancer patients enrolled  
245 in clinical trials; (2) the integration of genetic array databases and clinical data obtained from  
246 patients with cardiovascular disease; (3) computational biology and cytometry database  
247 management and analyses; (4) economic and health policy research using Medicare claims from  
248 over 40 million Medicare beneficiaries. PMACS requires all users of data or applications on  
249 PMACS servers to complete a PMACS-hosted cybersecurity awareness course annually, which  
250 stresses federal data security policies under data use agreements with the university. Curriculum  
251 includes HIPAA training and covers secure data transfer, passwords, computer security habits  
252 and knowledge of what constitutes misuse or inappropriate use of the server.

### 253 *11.3 Subject privacy*

254 All efforts will be made by study staff to ensure subject privacy. Data will be evaluated in a de-  
255 identified manner whenever possible.

### 256 *11.4 Data disclosure*

257 Information on patients will only be disclosed within the study team and to the patient's primary  
258 care clinician (to whom this information is already available).

### 259 *11.5 Data and safety monitoring*

260 A Data and Safety Monitoring Board (DSMB) is an independent group of experts convened to  
261 protect the safety of research subjects and to ensure that the scientific goals for the project are  
262 being met. The DSMB will be appointed by and act in an advisory capacity to the National  
263 Institute on Aging (NIA) to monitor participant safety, data quality and to evaluate the progress  
264 of the study. Adverse events will be tracked during the intervention period via monitoring of the  
265 electronic health record.

### 266 *11.6 Risk/benefit*

#### 267 *11.6.1 Potential study risks*

268 There are minimal risks to primary care providers (PCPs) and patients in this trial. Prescribing a  
269 statin is a standard of care for these patients. Statins have rare side effects that could impact some  
270 patients include muscle pain and damage to muscle cells that could impact renal or liver  
271 function. We will minimize risk by removing any patients with an adverse event or allergy  
272 related to statins that is documented with the electronic health record (EHR). We will also  
273 remove any patients with glomerular filtration rate less than 30 (requires dose reduction for  
274 statins) or hepatitis (elevated liver enzymes). While interventions will be targeted to PCPs, it  
275 ultimately their decision whether or not to use the platform to review patients and prescribe a  
276 statin.

277 There is a risk of breach of data and confidentiality. To minimize the risk of breach of data and  
278 confidentiality, we will use secure, encrypted servers to host the data and conduct the analysis.  
279 The Penn Medicine Academic Computing Services (PMACS) will be the hub for the hardware  
280 and database infrastructure that will support the project. The PMACS provides a secure  
281 computing environment for a large volume of highly sensitive data, including clinical, genetic,  
282 socioeconomic, and financial information. All members that access data must complete HIPAA  
283 (health insurance portability and accountability act) training including secure data transfer,  
284 passwords, computer security habits and knowledge of what constitutes misuse or inappropriate  
285 use of the server. Only trained study staff will have access to the code that links the unique  
286 identifier to the subject's identity.

#### 287 *11.6.2 Potential study benefits*

288 Statin therapy can reduce the risk of cardiovascular events for eligible patients but it is under-  
289 prescribed. The EHR could be utilized to identify eligible patients and to nudge providers to  
290 prescribe them. The knowledge gained on how to increase evidence-based statin prescribing  
291 rates could be applied to other populations and implemented at other health systems. PCPs may  
292 benefit from receiving feedback on their performance and having the EHR proactively remind  
293 them when patients are eligible.

#### 294 *11.6.3 Risk/benefit assessment*

295 The risk/benefit ratio is highly favorable given the potential benefit from eligible patients being  
296 prescribed a statin, that prescription and monitoring of a statin is within the standards of care in a  
297 primary care practice, and that efforts have been put into place to minimize the risk of breach of  
298 data.

299

300

Final Protocol

301

**No changes from the Original Protocol**

302
