# Supplementary material
Source: PubMed Central journal article supplement (PMC9713674)
Supplement: jamacardiol-e224373-s003.pdf [file jamacardiol-e224373-s003.pdf]

## **Data Sharing Statement**

Adusumalli. Effect of Nudges to Clinicians, Patients, or Both to Increase Statin Prescribing. *JAMA Cardiol.* Published November 30, 2022. doi:10.1001/jamacardio.2022.4373

### **Data**

**Data available:** No
